# Supplementary material for: Conserved and differential transcriptional responses of peroxisome associated pathways to drought, dehydration and ABA
Source: PubMed Central journal article supplement (PMC6137984; doi:10.1093/jxb/ery266), 2018-07-19
Supplement: ery266_suppl_supplementary_figure_s1.pdf [file ery266_suppl_supplementary_figure_s1.pdf]

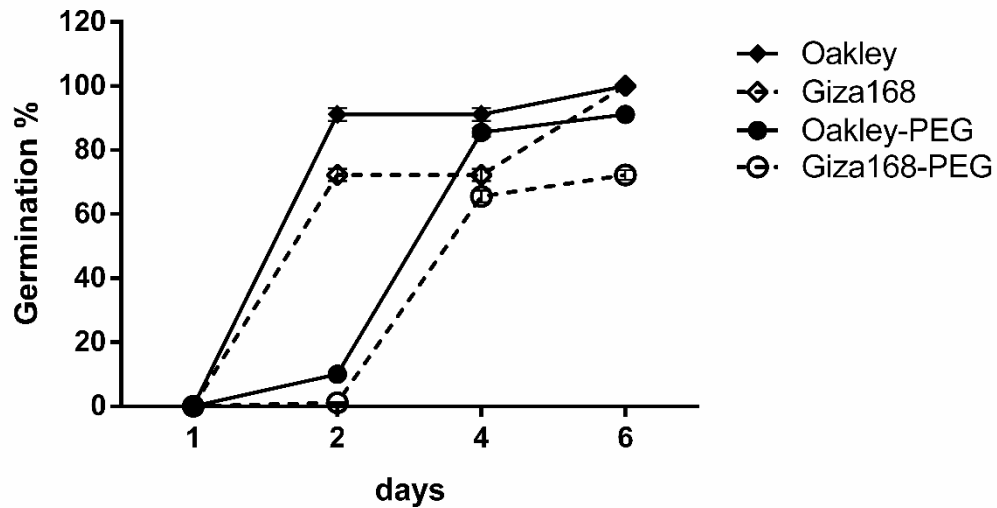

**Supplementary Figure 1:** Germination % of two wheat varieties, Giza 168 and Oakley under 20% PEG-6000. Data are shown as means  $\pm$  SE of three independent measurements, 30 seeds have been used to calculate the germination % and analysis of variance (ANOVA) with a level of significance of a  $P \leq 0.05$  to identify significant differences between the treatments. For determining the significant effects between the treatments, comparison was made using the least significant difference (LSD) test with a  $P \leq 0.05$
